# Supplementary material for: Self-assembled cobalt(ii)porphyrin–fulleropyrrolidine triads via axial coordination with photoinduced electron transfer
Source: Royal Society of Chemistry journal article supplement (doi:10.1039/c8nj00887f), 2018-01-01
Supplement: c8nj00887f1.pdf [file c8nj00887f1.pdf]

## Electronic Supplementary Information

### Self-Assembled via Axial Coordination Cobalt(II)porphyrin-Fulleropyrrolidine Triad with Photoinduced Electron Transfer

N.G. Bichan,<sup>®</sup> E.N. Ovchenkova, N.O. Kudryakova, A.A. Ksenofontov, M.S. Gruzdev, T.N. Lomova

G.A. Krestov Institute of Solution Chemistry of the Russian Academy of Sciences, Ivanovo,  
153045 Russia.

E-mail: bng@isc-ras.ru

|                                                                                                                                                                                                                                                                                                | Page |
|------------------------------------------------------------------------------------------------------------------------------------------------------------------------------------------------------------------------------------------------------------------------------------------------|------|
| <b>Figure S1.</b> UV-vis spectra of PyC <sub>60</sub> in toluene at 298 K. $C_{\text{PyC}_{60}} = 3.60 \times 10^{-5}$ (1), $4.85 \times 10^{-5}$ (2), $6.04 \times 10^{-5}$ (3), $9.19 \times 10^{-5}$ (4), $9.98 \times 10^{-5}$ (5), $1.20 \times 10^{-4}$ (6), $1.62 \times 10^{-4}$ (7) M | 2    |
| <b>Figure S2.</b> Plots of $\lg I$ vs $\lg C_{\text{PyC}_{60}}$ for the reaction of PyC <sub>60</sub> with Co <sup>II</sup> P at $\tau = 0$ .                                                                                                                                                  | 2    |
| <b>Figure S3.</b> Plot of $\lg k_{\text{ef}}$ versus $\lg C_{\text{PyC}_{60}}$ for the reaction of Co <sup>II</sup> P with PyC <sub>60</sub> in toluene at 298 K.                                                                                                                              | 2    |
| <b>Figure S4.</b> IR spectrum of (PyC <sub>60</sub> ) <sub>2</sub> Co <sup>II</sup> P.                                                                                                                                                                                                         | 3    |
| <b>Figure S5.</b> <sup>1</sup> H NMR spectra of compounds Co <sup>II</sup> P (a), (PyC <sub>60</sub> ) <sub>2</sub> Co <sup>II</sup> P (b) and PyC <sub>60</sub> (c) in CDCl <sub>3</sub> .                                                                                                    | 3    |
| Synthesis of (2,3,7,8,12,18-hexamethyl,13,17-diethyl,5-(2-pyridyl)porphinato)cobalt(II)                                                                                                                                                                                                        | 4    |
| Synthesis of 1'-N-methyl-2'-(pyridin-4-yl)pyrrolidino[3',4':1,2][60]fullerene                                                                                                                                                                                                                  | 4    |
| <b>Figure S6.</b> MALDI TOF mass-spectra of the PyC <sub>60</sub>                                                                                                                                                                                                                              | 5    |
| <b>Table S1.</b> The basic structural parameters (bond lengths, angles, Mulliken atomic charges ( $q$ )) of the (PyC <sub>60</sub> ) <sub>2</sub> Co <sup>II</sup> P optimized structure (B3LYP-D3/6-31G (d,p)).                                                                               | 6    |
| <b>Figure S7.</b> TDDFT spectrum of the PyC <sub>60</sub> (B3LYP-D3/6-31G (d,p), PCM(toluene)).                                                                                                                                                                                                | 7    |
| <b>Table S2.</b> Theoretically calculated spectral characteristics of of the PyC <sub>60</sub> in toluene and corresponding oscillator strengths ( $f$ ) (B3LYP-D3/6-31G (d,p)).                                                                                                               | 7    |
| <b>Table S3.</b> The photocurrent density of system Ti film 0.5 M Na <sub>2</sub> SO <sub>4</sub>  Pt.                                                                                                                                                                                         | 8    |
| <b>Figure S8.</b> Cyclic voltammogram of the PyC <sub>60</sub> (a), Co <sup>II</sup> P (b) and (PyC <sub>60</sub> ) <sub>2</sub> Co <sup>II</sup> P (c). Scan rate: 100 mV s <sup>-1</sup> .                                                                                                   | 8    |
| <b>Table S4.</b> Redox potentials, free-energy changes for charge separation ( $\Delta G_{\text{CS}}$ ) and recombination ( $\Delta G_{\text{CR}}$ ) for the (PyC <sub>60</sub> ) <sub>2</sub> Co <sup>II</sup> P in CH <sub>2</sub> Cl <sub>2</sub> .                                         | 9    |

**Figure S1.** UV-vis spectra of PyC<sub>60</sub> in toluene at 298 K.  $C_{\text{PyC}_{60}} = 3.60 \times 10^{-5}$  (1),  $4.85 \times 10^{-5}$  (2),  $6.04 \times 10^{-5}$  (3),  $9.19 \times 10^{-5}$  (4),  $9.98 \times 10^{-5}$  (5),  $1.20 \times 10^{-4}$  (6),  $1.62 \times 10^{-4}$  (7) M.

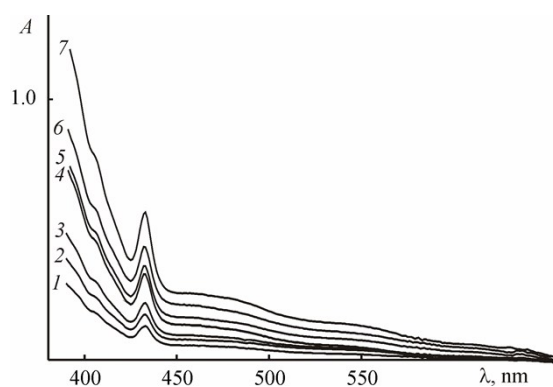

**Figure S2.** Plots of  $\lg I$  vs  $\lg C_{\text{PyC}_{60}}$  for the reaction of PyC<sub>60</sub> with Co<sup>II</sup>P at  $\tau = 0$ .

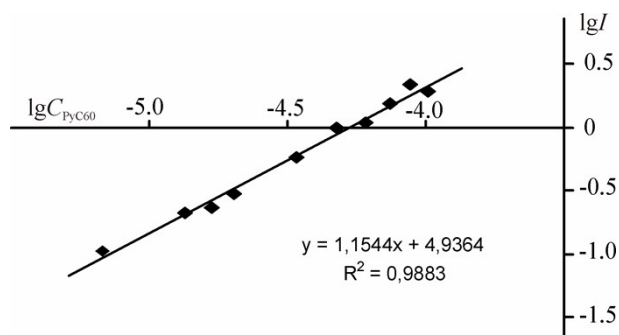

**Figure S3.** Plot of  $\lg k_{\text{ef}}$  versus  $\lg C_{\text{PyC}_{60}}$  for the reaction of Co<sup>II</sup>P with PyC<sub>60</sub> in toluene at 298 K.

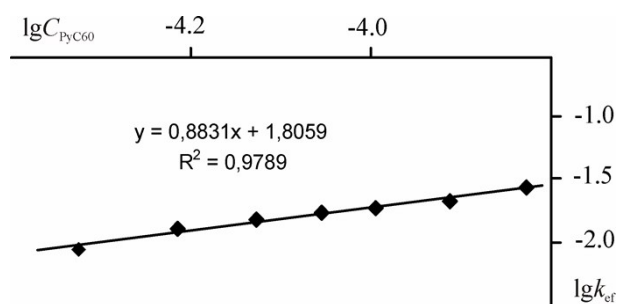

**Figure S4.** IR spectrum of  $(\text{PyC}_{60})_2\text{Co}^{\text{II}}\text{P}$ .

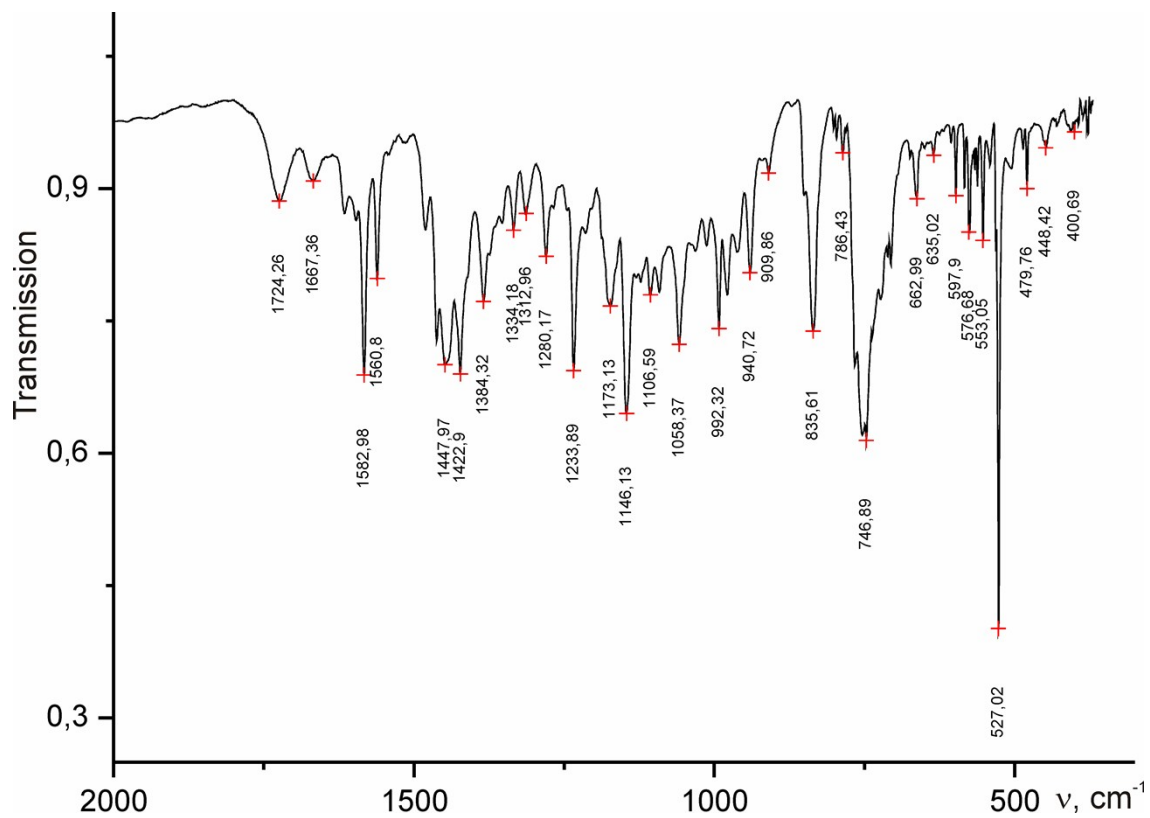

**Fig. S5.**  $^1\text{H}$  NMR spectra of compounds  $\text{Co}^{\text{II}}\text{P}$  (a),  $(\text{PyC}_{60})_2\text{Co}^{\text{II}}\text{P}$  (b) and  $\text{PyC}_{60}$  (c) in  $\text{CDCl}_3$ .

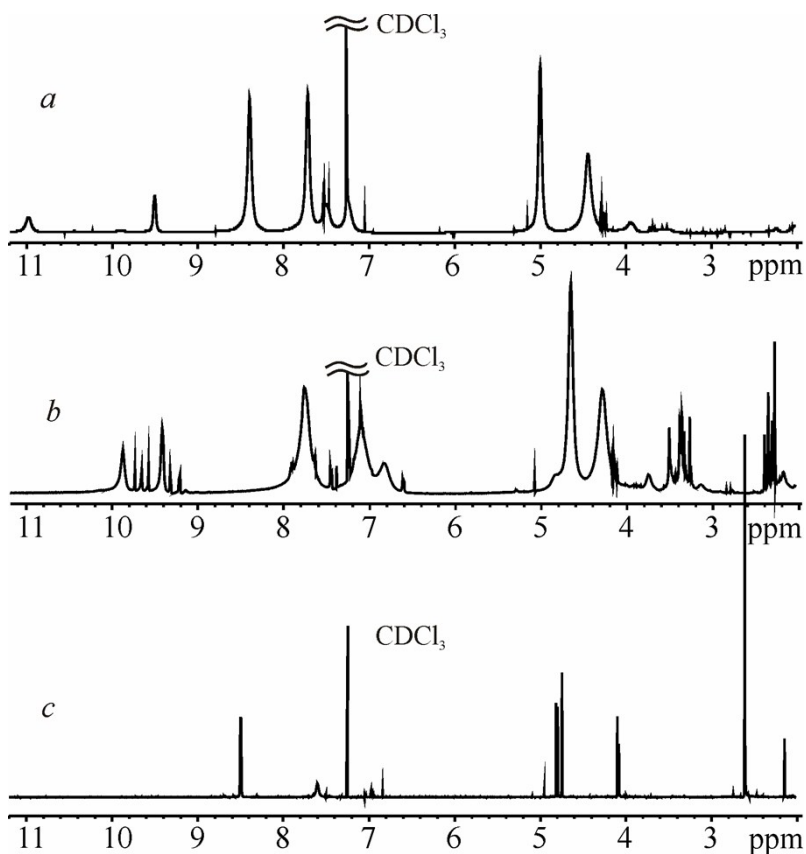

### **Synthesis of (2,3,7,8,12,18-hexamethyl,13,17-diethyl,5-(2-pyridyl)porphinato)cobalt(II), Co<sup>II</sup>P**

Co(AcO)<sub>2</sub>·4H<sub>2</sub>O (47.0 mg, 0.19 mmol) and (2,3,7,8,12,18-hexamethyl,13,17-diethyl,5-(2-pyridyl)porphyrin H<sub>2</sub>P (20.0 mg, 0.04 mmol) were reacted in boiling dimethylformamide (10 ml) for 40-50 min. Completion of the reaction was monitored by TLC, until no traces of starting material were detected. The reaction mixture was cooled, after dilution with water the products were extracted into chloroform and purified by flash chromatography (Al<sub>2</sub>O<sub>3</sub>/CHCl<sub>3</sub>). The red zone display on the chromatogram corresponding to Co<sup>II</sup>P.

### **Synthesis of 1'-N-methyl-2'-(pyridin-4-yl)pyrrolidino[3',4':1,2][60]fullerene, PyC<sub>60</sub>**

A solution of 100 mg (0.14 mmol) of C<sub>60</sub>, 80 mg (0.70 mmol) of pyridine-4-carboxaldehyde and 43 mg (0.48 mmol) of N-methylglycine in 90 ml of toluene was stirred at reflux temperature for 2 h. Then the solvent was removed in vacuo. The formation of PyC<sub>60</sub> was monitored by TLC and UV-Vis of the reaction mixture by the appearance of absorption with  $\lambda_{\max} = 433$  nm [M. Prato, M. Maggini, C. Giacometti, G.Scorrano et al. *Tetrahedron*, 1996, **52**, 5221; P.A. Troshin, S.I. Troyanov, G.N. Boiko, R.N. Lyubovskaya et al. *Fullerenes, nanotubes, and carbon nanostructures*, 2004, **12**, 413]. The reaction mixture was purified by column chromatography on Al<sub>2</sub>O<sub>3</sub> (elution with the mixture of toluene- ethyl acetate (20:1)). Yield: 0.64 mg (52%).

**Figure S6.** MALDI TOF mass-spectra of the PyC<sub>60</sub>.

Shimadzu Biotech Axima Confidence 2.9.3.20110624: Mode Reflectron, Power: 50, Blanked, %Int. 103 mV[sum= 11715 mV] Profiles 1-114 Smooth Av 5 -Baseline 20

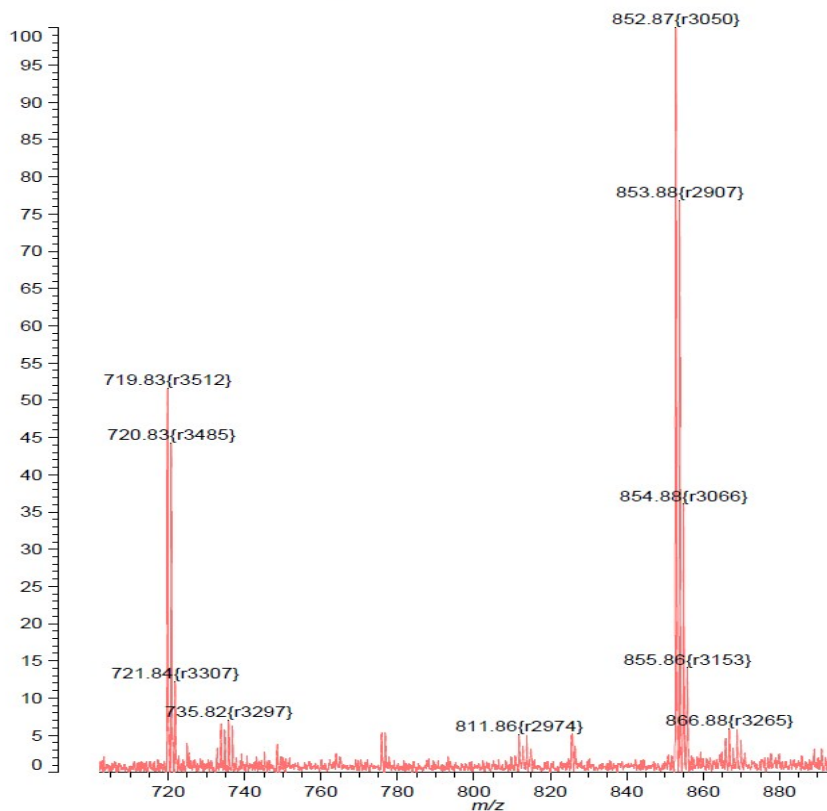

Although the PyC<sub>60</sub> is expected to give one signal in MALDI TOF mass-spectrum with m/z corresponding to the formula C<sub>68</sub>H<sub>10</sub>N<sub>2</sub> (calc. m/z 854.0) it gives the signal with m/z 719.83, corresponding to the [C<sub>60</sub>]<sup>+</sup>. It is expected that this signal are formed under the conditions of mass-spectrum registration.

**Table S1.** The basic structural parameters (bond lengths, angles, NBO atomic charges ( $q$ )) of the  $(\text{PyC}_{60})_2\text{Co}^{\text{II}}\text{P}$  optimized structure (B3LYP-D3/6-31G (d,p)).

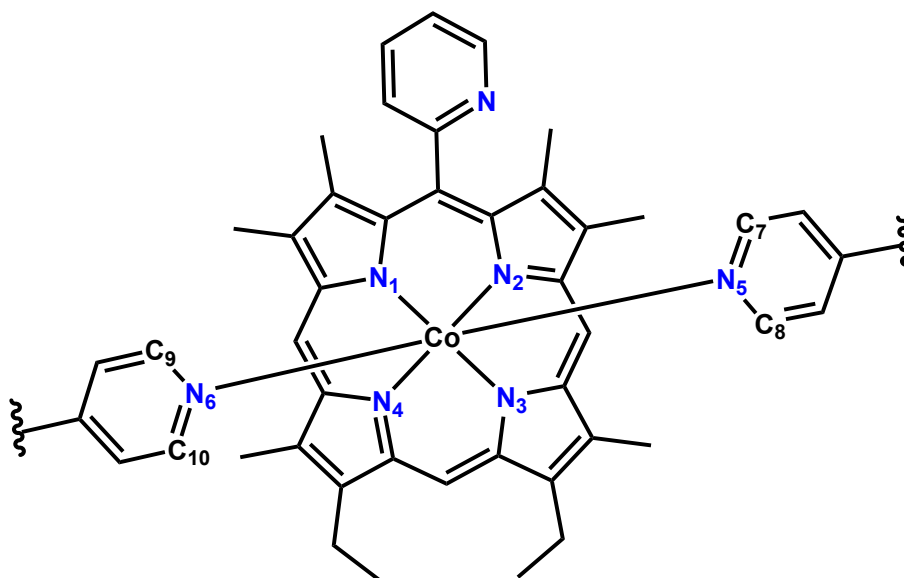

|         | Bond length, Å |               | Angle, grad |      | $q$ , $e^-$ |
|---------|----------------|---------------|-------------|------|-------------|
| Co–N(1) | 2.043          | N(1)–Co–N(2)  | 89.98       | Co   | 1.299       |
| Co–N(2) | 2.060          | N(2)–Co–N(3)  | 91.23       | N(1) | -0.637      |
| Co–N(3) | 2.094          | N(3)–Co–N(4)  | 89.50       | N(2) | -0.644      |
| Co–N(4) | 2.084          | N(4)–Co–N(1)  | 91.27       | N(3) | -0.640      |
| Co–N(5) | 2.288          | N(1)–Co–N(3)  | 178.38      | N(4) | -0.639      |
| Co–N(6) | 2.263          | N(2)–Co–N(4)  | 178.48      | N(5) | -0.497      |
|         |                | N(1)–Co–N(5)  | 91.55       | N(6) | -0.491      |
|         |                | N(2)–Co–N(5)  | 88.45       |      |             |
|         |                | N(3)–Co–N(5)  | 89.57       |      |             |
|         |                | N(4)–Co–N(5)  | 91.99       |      |             |
|         |                | Co–N(5)–C(7)  | 114.63      |      |             |
|         |                | Co–N(5)–C(8)  | 118.83      |      |             |
|         |                | N(1)–Co–N(6)  | 87.48       |      |             |
|         |                | N(2)–Co–N(6)  | 91.02       |      |             |
|         |                | N(3)–Co–N(6)  | 91.41       |      |             |
|         |                | N(4)–Co–N(6)  | 88.17       |      |             |
|         |                | Co–N(6)–C(9)  | 118.88      |      |             |
|         |                | Co–N(6)–C(10) | 120.10      |      |             |

**Figure S7.** TDDFT spectrum of the PyC<sub>60</sub> (B3LYP-D3/6-31G (d,p), PCM(toluene)).

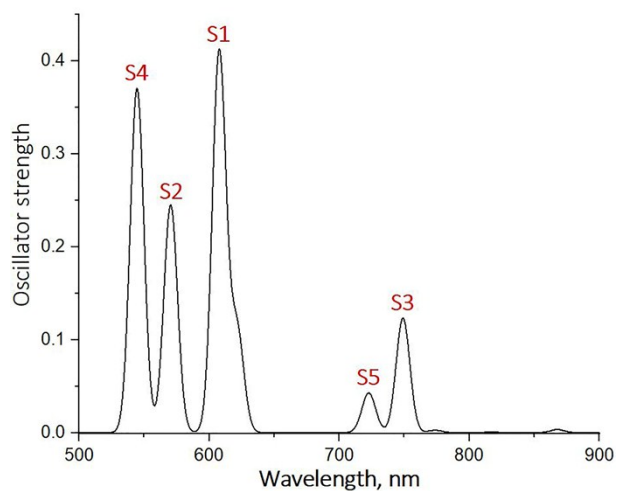

**Table S2.** Theoretically calculated spectral characteristics of the PyC<sub>60</sub> in toluene and corresponding oscillator strengths (*f*) (B3LYP-D3/6-31G (d,p)).

| State | Transition | Energy, eV | <i>f</i> |
|-------|------------|------------|----------|
| S1    | H-1 L      | 2.041      | 0.41     |
| S2    | H-1 L+8    | 2.174      | 0.25     |
| S3    | H-2 L      | 1.665      | 0.12     |
| S4    | H-3 L      | 2.278      | 0.23     |
| S5    | H-2 L+2    | 1.716      | 0.04     |

**Table S3. The photocurrent density\* of system Ti|film|0.5 M Na<sub>2</sub>SO<sub>4</sub>|Pt.**

| Titanium electrode with natural oxide film                                                                                                                  | $j_{ph}^1$ , $\mu\text{A cm}^{-2}$ | $j_{ph}^2$ , $\mu\text{A cm}^{-2}$ | $j_{ph}^3$ , $\mu\text{A cm}^{-2}$ | $j_{ph}^4$ , $\mu\text{A cm}^{-2}$ | $j_{ph}^5$ , $\mu\text{A cm}^{-2}$ | $j_{ph}^6$ , $\mu\text{A cm}^{-2}$ | $j_{ph}^{avg}$ , $\mu\text{A cm}^{-2}$ |
|-------------------------------------------------------------------------------------------------------------------------------------------------------------|------------------------------------|------------------------------------|------------------------------------|------------------------------------|------------------------------------|------------------------------------|----------------------------------------|
| NOF                                                                                                                                                         | 0                                  | 0                                  | 0                                  | 0                                  | 0                                  | 0                                  | 0                                      |
| Co <sup>II</sup> P<br>( $C_{Co^{II}P} = 1.80 \times 10^{-5} \text{ M}$ )                                                                                    | 118.92                             | 112.90                             | 115.11                             | 119.28                             | 117.65                             | 116.28                             | 116.69                                 |
| PyC <sub>60</sub><br>( $C_{PyC60} = 1.47 \times 10^{-4} \text{ M}$ )                                                                                        | 95.19                              | 97.71                              | 96.35                              | 99.13                              | 95.13                              | 95.12                              | 96.58                                  |
| (PyC <sub>60</sub> ) <sub>2</sub> Co <sup>II</sup> P<br>( $C_{Co^{II}P} = 1.80 \times 10^{-5} \text{ M}$ ,<br>$C_{PyC60} = 1.47 \times 10^{-4} \text{ M}$ ) | 289.93                             | 287.52                             | 288.03                             | 283.38                             | 285.77                             | 287.61                             | 287.04                                 |

\*  $j_{ph} = i/S$ , here  $i$ - photocurrent,  $\mu\text{A}$ ; S- the surface area of the modified electrode illuminated by monochromatic UV light (365 nm).

<sup>1-6</sup> - number of experiment

**Figure S8.** Cyclic voltammogram of the PyC<sub>60</sub> (a), Co<sup>II</sup>P (b) and (PyC<sub>60</sub>)<sub>2</sub>Co<sup>II</sup>P (c) in CH<sub>2</sub>Cl<sub>2</sub> containig 0.1 M (n-Bu)<sub>4</sub>NClO<sub>4</sub> supporting electrolyte. Scan rate: 100 mV s<sup>-1</sup>.

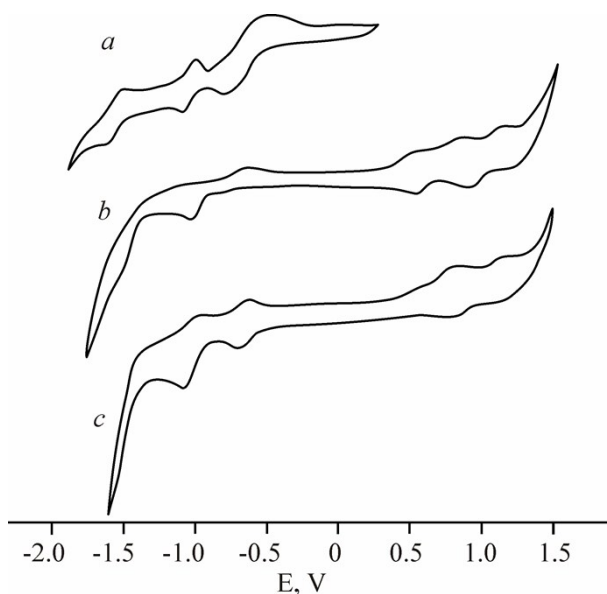



**Table S4.** Redox potentials, free-energy changes for charge separation ( $\Delta G_{CS}$ ) and recombination ( $\Delta G_{CR}$ ) for the  $(\text{PyC}_{60})_2\text{Co}^{\text{II}}\text{P}$  in  $\text{CH}_2\text{Cl}_2$ .

| Compound                                           | $E_{1\text{D}_{\text{ox}}}$ | $E_{2\text{D}_{\text{ox}}}$ | $E_{1/2}(\text{D}^{\bullet+}/\text{D})$ | $E_{1\text{A}_{\text{red}}}$ | $E_{2\text{A}_{\text{red}}}$ | $E_{1/2}(\text{A}/\text{A}^{\bullet-})$ | $-\Delta G_{\text{CR}}, \text{eV}$ | $-\Delta G_{\text{CS}}, \text{eV}$ |
|----------------------------------------------------|-----------------------------|-----------------------------|-----------------------------------------|------------------------------|------------------------------|-----------------------------------------|------------------------------------|------------------------------------|
| $(\text{PyC}_{60})_2\text{Co}^{\text{II}}\text{P}$ | 0.80                        | 1.17                        | 0.74                                    | -0.64                        | -1.02                        | -0.58                                   | 1.32                               | 0.72                               |

$$-\Delta G_{\text{CR}} = E_{1/2}(\text{D}^{\bullet+}/\text{D}) - E_{1/2}(\text{A}/\text{A}^{\bullet-})^{\text{a}}$$

$$-\Delta G_{\text{CS}} = E_{0-0} - (-\Delta G_{\text{CR}})^{\text{a}}$$

<sup>a</sup> A. Bagaki, H.B. Gobeze, G. Charalambidis, A. Charisiadis, C. Stangel, V. Nikolaou, A. Stergiou, N. Tagmatarchis, F. D'Souza and A.G. Coutsolelos, *Inorg. Chem.*, 2017, **56**, 10268-10280.

$E_{1\text{D}_{\text{ox}}}$  – the first oxidation potential of electron donor ( $\text{Co}^{\text{II}}\text{P}$ ).

$E_{2\text{D}_{\text{ox}}}$  – the second oxidation potential of electron donor.

$E_{1/2}(\text{D}^{\bullet+}/\text{D})$  – the potential for the first oxidation process of the donor.

$E_{1\text{A}_{\text{red}}}$  – the first reduction potential of electron acceptor ( $\text{PyC}_{60}$ ).

$E_{2\text{A}_{\text{red}}}$  – the second reduction potential of electron acceptor.

$E_{1/2}(\text{A}/\text{A}^{\bullet-})$  – the potential for the first reduction process of the acceptor.
